# Supplementary material for: Perturbed myoepithelial cell differentiation in BRCA mutation carriers and in ductal carcinoma in situ
Source: PubMed Central journal article supplement (PMC6744561; doi:10.1038/s41467-019-12125-5), 2019-09-13
Supplement: 41467_2019_12125_MOESM11_ESM.pdf [file 41467_2019_12125_MOESM11_ESM.pdf]

## Reporting Summary

Nature Research wishes to improve the reproducibility of the work that we publish. This form provides structure for consistency and transparency in reporting. For further information on Nature Research policies, see [Authors & Referees](#) and the [Editorial Policy Checklist](#).

### Statistics

For all statistical analyses, confirm that the following items are present in the figure legend, table legend, main text, or Methods section.

n/a Confirmed

- |                                     |                                     |                                                                                                                                                                                                                                                            |
|-------------------------------------|-------------------------------------|------------------------------------------------------------------------------------------------------------------------------------------------------------------------------------------------------------------------------------------------------------|
| <input type="checkbox"/>            | <input checked="" type="checkbox"/> | The exact sample size ( $n$ ) for each experimental group/condition, given as a discrete number and unit of measurement                                                                                                                                    |
| <input type="checkbox"/>            | <input checked="" type="checkbox"/> | A statement on whether measurements were taken from distinct samples or whether the same sample was measured repeatedly                                                                                                                                    |
| <input type="checkbox"/>            | <input checked="" type="checkbox"/> | The statistical test(s) used AND whether they are one- or two-sided<br><i>Only common tests should be described solely by name; describe more complex techniques in the Methods section.</i>                                                               |
| <input type="checkbox"/>            | <input checked="" type="checkbox"/> | A description of all covariates tested                                                                                                                                                                                                                     |
| <input type="checkbox"/>            | <input checked="" type="checkbox"/> | A description of any assumptions or corrections, such as tests of normality and adjustment for multiple comparisons                                                                                                                                        |
| <input type="checkbox"/>            | <input checked="" type="checkbox"/> | A full description of the statistical parameters including central tendency (e.g. means) or other basic estimates (e.g. regression coefficient) AND variation (e.g. standard deviation) or associated estimates of uncertainty (e.g. confidence intervals) |
| <input type="checkbox"/>            | <input checked="" type="checkbox"/> | For null hypothesis testing, the test statistic (e.g. $F$ , $t$ , $r$ ) with confidence intervals, effect sizes, degrees of freedom and $P$ value noted<br><i>Give <math>P</math> values as exact values whenever suitable.</i>                            |
| <input checked="" type="checkbox"/> | <input type="checkbox"/>            | For Bayesian analysis, information on the choice of priors and Markov chain Monte Carlo settings                                                                                                                                                           |
| <input checked="" type="checkbox"/> | <input type="checkbox"/>            | For hierarchical and complex designs, identification of the appropriate level for tests and full reporting of outcomes                                                                                                                                     |
| <input type="checkbox"/>            | <input checked="" type="checkbox"/> | Estimates of effect sizes (e.g. Cohen's $d$ , Pearson's $r$ ), indicating how they were calculated                                                                                                                                                         |

*Our web collection on [statistics for biologists](#) contains articles on many of the points above.*

### Software and code

Policy information about [availability of computer code](#)

Data collection

Image analysis was performed on single or montage images captured by confocal microscopy (Yokogawa spinning disk confocal/TIRF system, for human tissue samples) or performed by Service Bio (xenograft samples). CyTOF data were acquired at a CyTOF Helios instrument (Fluidigm). FACS data were acquired M Fortessa and M Aria II SORP UV. ChIP-seq and RNA-seq were performed using Illumina Nextseq.

Data analysis

Statistical analyses were performed using GraphPad Prism software or R. SAGEseq data was analyzed using SAGE Genie, RNAseq experiments were analyzed using STAR and DeSeq2 R package and ChIPseq data was analyzed using ChiLin pipeline 2.0.0, MACS2, Deeptools and ROSE.

For manuscripts utilizing custom algorithms or software that are central to the research but not yet described in published literature, software must be made available to editors/reviewers. We strongly encourage code deposition in a community repository (e.g. GitHub). See the Nature Research [guidelines for submitting code & software](#) for further information.

### Data

Policy information about [availability of data](#)

All manuscripts must include a [data availability statement](#). This statement should provide the following information, where applicable:

- Accession codes, unique identifiers, or web links for publicly available datasets
- A list of figures that have associated raw data
- A description of any restrictions on data availability

All raw genomic data was deposited to GEO under accession number GSE113909. Secure token for reviewer access while it remains in private status: cfyxmkkoxrtrux

## Field-specific reporting

Please select the one below that is the best fit for your research. If you are not sure, read the appropriate sections before making your selection.

- Life sciences     Behavioural & social sciences     Ecological, evolutionary & environmental sciences

For a reference copy of the document with all sections, see [nature.com/documents/nr-reporting-summary-flat.pdf](https://www.nature.com/documents/nr-reporting-summary-flat.pdf)

## Life sciences study design

All studies must disclose on these points even when the disclosure is negative.

|                 |                                                                                                                                                                                                                                                                                                                                                                                                                                                                                                                                                                                                                                           |
|-----------------|-------------------------------------------------------------------------------------------------------------------------------------------------------------------------------------------------------------------------------------------------------------------------------------------------------------------------------------------------------------------------------------------------------------------------------------------------------------------------------------------------------------------------------------------------------------------------------------------------------------------------------------------|
| Sample size     | Experiments were performed as follows; tissue samples analyzed (n=4-35, as indicated in the figures), in vitro studies (N=2 for proliferation, adhesion, invasion and migration assay in duplicate/triplicate; for adhesion and proliferation assay, representative experiment is shown), RNA-seq (N=1-2, depending on cell type), ChIP-seq (n=1 for human tissues, 3 tissue/group). The number of animals per each group was determined based on our prior study using the same model (Marusyk et al., Nature 2014 and Hu et al. Cancer Cell 2008). We estimated that 5 animals per group would account for variability in tumor growth. |
| Data exclusions | N/A                                                                                                                                                                                                                                                                                                                                                                                                                                                                                                                                                                                                                                       |
| Replication     | Tumor growth assays were reproduced in multiple independent experiments.                                                                                                                                                                                                                                                                                                                                                                                                                                                                                                                                                                  |
| Randomization   | N/A                                                                                                                                                                                                                                                                                                                                                                                                                                                                                                                                                                                                                                       |
| Blinding        | Mouse experiment was repeated by technical assistants in the Lurie Imaging Center who were blinded to the identity of the samples. Similarly, some RNAseq and ChIPseq was performed by bioinformatician in the Center for Functional Cancer Epigenetics blinded to the identity of the samples.                                                                                                                                                                                                                                                                                                                                           |

## Reporting for specific materials, systems and methods

We require information from authors about some types of materials, experimental systems and methods used in many studies. Here, indicate whether each material, system or method listed is relevant to your study. If you are not sure if a list item applies to your research, read the appropriate section before selecting a response.

### Materials & experimental systems

| n/a                                 | Involvement in the study                                        |
|-------------------------------------|-----------------------------------------------------------------|
| <input type="checkbox"/>            | <input checked="" type="checkbox"/> Antibodies                  |
| <input type="checkbox"/>            | <input checked="" type="checkbox"/> Eukaryotic cell lines       |
| <input checked="" type="checkbox"/> | <input type="checkbox"/> Palaeontology                          |
| <input type="checkbox"/>            | <input checked="" type="checkbox"/> Animals and other organisms |
| <input checked="" type="checkbox"/> | <input type="checkbox"/> Human research participants            |
| <input checked="" type="checkbox"/> | <input type="checkbox"/> Clinical data                          |

### Methods

| n/a                                 | Involvement in the study                           |
|-------------------------------------|----------------------------------------------------|
| <input type="checkbox"/>            | <input checked="" type="checkbox"/> ChIP-seq       |
| <input type="checkbox"/>            | <input checked="" type="checkbox"/> Flow cytometry |
| <input checked="" type="checkbox"/> | <input type="checkbox"/> MRI-based neuroimaging    |

## Antibodies

|                 |                                                                                                                                                                                                                                                                                                                                                                                          |
|-----------------|------------------------------------------------------------------------------------------------------------------------------------------------------------------------------------------------------------------------------------------------------------------------------------------------------------------------------------------------------------------------------------------|
| Antibodies used | All antibodies used in this study are described in the text and detailed information provided in the methods.                                                                                                                                                                                                                                                                            |
| Validation      | Antibodies used for FACS and CYTOF staining were validated using cell lines with known expression of the marker, and the obtained percentages corresponded well to the expected values. IHC and IF antibodies were validated on cell-line derived xenografts with known expression of the marker. Immunoblot antibodies were validated on shRNA-expressing or overexpression cell lines. |

## Eukaryotic cell lines

Policy information about [cell lines](#)

|                          |                                                                                                                                                                                                |
|--------------------------|------------------------------------------------------------------------------------------------------------------------------------------------------------------------------------------------|
| Cell line source(s)      | Cell line MCF10DCIS.com was obtained from Fred Miller, Karmanos Cancer Research Institute, Jurkat and DU4475 cell lines were from ATCC.                                                        |
| Authentication           | MCF10DCIS.com, Jurkat and DU4475 cell lines were tested by STR and SNP array profiling by the DFCI Molecular Biology core facility, MCF10DCIS.com was also subject to whole genome sequencing. |
| Mycoplasma contamination | MCF10DCIS.com, Jurkat and DU4475 cell lines were routinely tested for mycoplasma and rodent pathogen contamination. No contamination was found at any time point.                              |

Commonly misidentified lines  
(See [ICLAC](#) register)

Name any commonly misidentified cell lines used in the study and provide a rationale for their use.

## Animals and other organisms

Policy information about [studies involving animals](#); [ARRIVE guidelines](#) recommended for reporting animal research

Laboratory animals

4–6-weeks old female mice NCR-nude mice (Taconic) or NSG (Jackson Labs) were used following ACUC-approved protocols.

Wild animals

N/A

Field-collected samples

N/A

Ethics oversight

Animal experiments were performed by the Lurie Family Imaging Center following protocols approved by the Dana-Farber Cancer Institute Animal Care and Use Committee.

Note that full information on the approval of the study protocol must also be provided in the manuscript.

## ChIP-seq

### Data deposition

Confirm that both raw and final processed data have been deposited in a public database such as [GEO](#).

Confirm that you have deposited or provided access to graph files (e.g. BED files) for the called peaks.

Data access links

*May remain private before publication.*

All raw genomic data was deposited to GEO under accession number GSE113909. Secure token for reviewer access while it remains in private status: cfyxmkkoxrtrux

Files in database submission

MCF10DCIS\_H3K27ac\_peaks.filtered.narrowPeak  
MCF10DCIS\_p63\_only.narrowPeak  
MCF10DCIS-TetTCF7\_H3K27ac.rep1\_sorted\_peaks.narrowPeak.bed  
MCF10DCIS-TetTCF7\_TCF7-HA\_New.rep1\_sorted\_peaks.narrowPeak.bed  
Myoep\_N293\_p63\_peaks.narrowPeak  
Myoep\_N309\_p63\_peaks.narrowPeak  
Myoep\_N322\_p63\_peaks.narrowPeak  
Myoep\_N323\_p63\_peaks.narrowPeak  
Myoep\_N325\_p63\_peaks.narrowPeak  
Myoep\_N334\_p63\_peaks.narrowPeak  
Myoep\_N342\_p63\_peaks.narrowPeak  
Myoep\_N350\_p63\_peaks.narrowPeak  
20141103-N309-p63-YS1437\_S1\_R1.fastq.gz  
20160821-IdxF6-BJ039-Ft-p63-8-8-16-MD3366\_S6\_R1\_001.fastq.gz  
20160821-IdxG6-BJ040-Ft-p63-8-8-16-MD3366\_S7\_R1\_001.fastq.gz  
20160229-BJ34-p63ChIP-IDX21-MD2819-2\_S1\_R1\_001.fastq.gz  
20160229-BJ36-p63ChIP-IDX23-MD2819-2\_S3\_R1\_001.fastq.gz  
20160229-BJ37-p63ChIP-IDX24-MD2819-2\_S4\_R1\_001.fastq.gz  
20160229-BJ35-p63ChIP-IDX22-MD2819-2\_S2\_R1\_001.fastq.gz  
20160821-IdxH6-BJ041-Ft-p63-8-8-16-MD3366\_S8\_R1\_001.fastq.gz  
20141103-MCFDCIS-p63-YS1437\_S5\_R1.fastq.gz  
20141110-Idx5-MCFDCIS-H3K27ac-MD1460\_S5\_R1.fastq.gz  
20141110-Idx7-MCFDCIS-TetTCF7-H3K27ac-MD1460\_S7\_R1.fastq.gz  
20141110-Idx3-MCFDCIS-Input-MD1460\_S3\_R1.fastq.gz  
20180120\_Dox\_DSGPFA\_inputKH5190\_S4\_R1\_001.fastq.gz  
Myoep\_N250\_H3K27ac\_peaks\_sorted.bed  
Myoep\_N293\_H3K27ac\_peaks\_sorted.bed  
Myoep\_N274\_H3K27ac\_peaks\_sorted.bed  
Myoep\_N296\_H3K27ac\_peaks\_sorted.bed  
20141103-N250-H3K27Ac-YS1437\_S9\_R1.fastq.gz  
20141110-Idx11-N293-H3K27ac-MD1460\_S8\_R1.fastq.gz  
20141103-N274-H3K27Ac-YS1437\_S10\_R1.fastq.gz  
20140818-N296-H3K27Ac-YS1223\_S10\_R1.fastq.gz  
YS8\_N250\_INPUT\_08\_08\_13\_GCCAAT\_L002\_R1\_001.fastq.gz  
BRCA1\_201\_TCF7.rep1\_sorted\_peaks.narrowPeak.bed  
BRCA1\_448\_TCF7.rep1\_sorted\_peaks.narrowPeak.bed  
BRCA2\_156\_TCF7.rep1\_sorted\_peaks.narrowPeak.bed  
BRCA2\_393\_TCF7.rep1\_sorted\_peaks.narrowPeak.bed  
Normal\_309\_TCF7.rep1\_sorted\_peaks.narrowPeak.bed  
Normal\_435\_TCF7.rep1\_sorted\_peaks.narrowPeak.bed  
TCF7\_DU4415.rep1\_sorted\_peaks.narrowPeak.bed  
20190122\_309\_input\_KH6570\_S1\_R1\_001.fastq.gz  
20190122\_393\_input\_KH6570\_S9\_R1\_001.fastq.gz  
20190122\_393\_TCF7\_KH6570\_S18\_R1\_001.fastq.gz

20190122\_448\_TCF7\_KH6570\_S15\_R1\_001.fastq.gz  
 20190122\_309\_TCF7\_KH6570\_S10\_R1\_001.fastq.gz  
 20190122\_448\_input\_KH6570\_S6\_R1\_001.fastq.gz  
 20190122\_201\_TCF7\_KH6570\_S13\_R1\_001.fastq.gz  
 20190122\_435\_TCF7\_KH6570\_S12\_R1\_001.fastq.gz  
 20190122\_156\_input\_KH6570\_S7\_R1\_001.fastq.gz  
 20190122\_156\_TCF7\_KH6570\_S16\_R1\_001.fastq.gz  
 20190122\_201\_input\_KH6570\_S4\_R1\_001.fastq.gz  
 20190122\_435\_input\_KH6570\_S3\_R1\_001.fastq.gz

Genome browser session  
 (e.g. [UCSC](#))

*Provide a link to an anonymized genome browser session for "Initial submission" and "Revised version" documents only, to enable peer review. Write "no longer applicable" for "Final submission" documents.*

## Methodology

Replicates

*Describe the experimental replicates, specifying number, type and replicate agreement.*

Sequencing depth

MCF10DCIS\_H3K27ac\_peaks.filtered.narrowPeak  
 MCF10DCIS\_p63\_only.narrowPeak  
 MCF10DCIS-TetTCF7\_H3K27ac.rep1\_sorted\_peaks.narrowPeak.bed  
 MCF10DCIS-TetTCF7\_TCF7-HA\_New.rep1\_sorted\_peaks.narrowPeak.bed  
 Myoep\_N293\_p63\_peaks.narrowPeak  
 Myoep\_N309\_p63\_peaks.narrowPeak  
 Myoep\_N322\_p63\_peaks.narrowPeak  
 Myoep\_N323\_p63\_peaks.narrowPeak  
 Myoep\_N325\_p63\_peaks.narrowPeak  
 Myoep\_N334\_p63\_peaks.narrowPeak  
 Myoep\_N342\_p63\_peaks.narrowPeak  
 Myoep\_N350\_p63\_peaks.narrowPeak  
 20141103-N309-p63-YS1437\_S1\_R1.fastq.gz  
 20160821-IdxF6-BJ039-Ft-p63-8-8-16-MD3366\_S6\_R1\_001.fastq.gz  
 20160821-IdxG6-BJ040-FT-p63-8-8-16-MD3366\_S7\_R1\_001.fastq.gz  
 20160229-BJ34-p63ChIP-IDX21-MD2819-2\_S1\_R1\_001.fastq.gz  
 20160229-BJ36-p63ChIP-IDX23-MD2819-2\_S3\_R1\_001.fastq.gz  
 20160229-BJ37-p63ChIP-IDX24-MD2819-2\_S4\_R1\_001.fastq.gz  
 20160229-BJ35-p63ChIP-IDX22-MD2819-2\_S2\_R1\_001.fastq.gz  
 20160821-IdxH6-BJ041-FT-p63-8-8-16-MD3366\_S8\_R1\_001.fastq.gz  
 20141103-MCFDCIS-p63-YS1437\_S5\_R1.fastq.gz  
 20141110-Idx5-MCFDCIS-H3K27ac-MD1460\_S5\_R1.fastq.gz  
 20141110-Idx7-MCFDCIS-TetTCF7-H3K27ac-MD1460\_S7\_R1.fastq.gz  
 20141110-Idx3-MCFDCIS-Input-MD1460\_S3\_R1.fastq.gz  
 20180120\_Dox\_DSGPFA\_inputKH5190\_S4\_R1\_001.fastq.gz  
 Myoep\_N250\_H3K27ac\_peaks\_sorted.bed  
 Myoep\_N293\_H3K27ac\_peaks\_sorted.bed  
 Myoep\_N274\_H3K27ac\_peaks\_sorted.bed  
 Myoep\_N296\_H3K27ac\_peaks\_sorted.bed  
 20141103-N250-H3K27Ac-YS1437\_S9\_R1.fastq.gz  
 20141110-Idx11-N293-H3K27ac-MD1460\_S8\_R1.fastq.gz  
 20141103-N274-H3K27Ac-YS1437\_S10\_R1.fastq.gz  
 20140818-N296-H3K27Ac-YS1223\_S10\_R1.fastq.gz  
 YS8\_N250\_INPUT\_08\_08\_13\_GCCAAAT\_L002\_R1\_001.fastq.gz  
 BRCA1\_201\_TCF7.rep1\_sorted\_peaks.narrowPeak.bed  
 BRCA1\_448\_TCF7.rep1\_sorted\_peaks.narrowPeak.bed  
 BRCA2\_156\_TCF7.rep1\_sorted\_peaks.narrowPeak.bed  
 BRCA2\_393\_TCF7.rep1\_sorted\_peaks.narrowPeak.bed  
 Normal\_309\_TCF7.rep1\_sorted\_peaks.narrowPeak.bed  
 Normal\_435\_TCF7.rep1\_sorted\_peaks.narrowPeak.bed  
 TCF7\_DU4415.rep1\_sorted\_peaks.narrowPeak.bed  
 20190122\_309\_input\_KH6570\_S1\_R1\_001.fastq.gz  
 20190122\_393\_input\_KH6570\_S9\_R1\_001.fastq.gz  
 20190122\_393\_TCF7\_KH6570\_S18\_R1\_001.fastq.gz  
 20190122\_448\_TCF7\_KH6570\_S15\_R1\_001.fastq.gz  
 20190122\_309\_TCF7\_KH6570\_S10\_R1\_001.fastq.gz  
 20190122\_448\_input\_KH6570\_S6\_R1\_001.fastq.gz  
 20190122\_201\_TCF7\_KH6570\_S13\_R1\_001.fastq.gz  
 20190122\_435\_TCF7\_KH6570\_S12\_R1\_001.fastq.gz  
 20190122\_156\_input\_KH6570\_S7\_R1\_001.fastq.gz  
 20190122\_156\_TCF7\_KH6570\_S16\_R1\_001.fastq.gz  
 20190122\_201\_input\_KH6570\_S4\_R1\_001.fastq.gz  
 20190122\_435\_input\_KH6570\_S3\_R1\_001.fastq.gz

Antibodies

antibodies p63 (abcam, ab735), H3K27ac (abcam, ab4729), TCF7 (Sigma, WH0006932M1) and HA (abcam, ab9110)

Peak calling parameters

MACS2 (v 2.1.1.20160309) as a peak caller, with a q-value (FDR) threshold of 0.1

|              |                                                                                                                                                                                                                                                                                                                                                                                                                                                                                                                                                                                                                                                                                                                                                                                                                                                                                                                                                                                                                                                                                                                                                                                                                                                                                                                                                                                                                                                   |
|--------------|---------------------------------------------------------------------------------------------------------------------------------------------------------------------------------------------------------------------------------------------------------------------------------------------------------------------------------------------------------------------------------------------------------------------------------------------------------------------------------------------------------------------------------------------------------------------------------------------------------------------------------------------------------------------------------------------------------------------------------------------------------------------------------------------------------------------------------------------------------------------------------------------------------------------------------------------------------------------------------------------------------------------------------------------------------------------------------------------------------------------------------------------------------------------------------------------------------------------------------------------------------------------------------------------------------------------------------------------------------------------------------------------------------------------------------------------------|
| Data quality | QC passed in pipeline                                                                                                                                                                                                                                                                                                                                                                                                                                                                                                                                                                                                                                                                                                                                                                                                                                                                                                                                                                                                                                                                                                                                                                                                                                                                                                                                                                                                                             |
| Software     | <p>ChiLin pipeline 2.0.0 (Qin Q, Mei S, Wu Q, et al. ChiLin: a comprehensive ChIP-seq and DNase-seq quality control and analysis pipeline. BMC bioinformatics. 2016;17(1):404. doi:10.1186/s12859-016-1274-4.) is used for QC and preprocess of the ChIP-seq. We use Burrows-Wheeler Aligner (Li H. and Durbin R. (2009) Fast and accurate short read alignment with Burrows-Wheeler Transform. Bioinformatics, 25:1754-60. [PMID: 19451168]) as a read mapping tool, and Model-based Analysis of ChIP-Seq MACS2 (v 2.1.1.20160309) as a peak caller, with a q-value (FDR) threshold of 0.1. Based on a dynamic Poisson distribution MACS2 can effectively capture local biases in the genome sequence, allowing for more sensitive and robust prediction of binding sites. Unique read for a position for peak calling is used to reduce false positive peaks, statically significant peaks are finally selected by calculated false discovery rate of reported peaks.</p> <p>Following QC methods have applied to the ChIP-seq data. i) sequence quality QC, we calculates these scores using the FastQC software[4]. A good sequence quality score is <math>\geq 25</math> ; ii) PCR Bottleneck Coefficient - PBC score <math>\geq 0.90</math>; iii) percentage overlap with known DHSs derived from the ENCODE Project (the minimum required was 70%); iv) peak conservations; v) number of total peaks (the minimum required was 1,000).</p> |

## Flow Cytometry

### Plots

Confirm that:

- The axis labels state the marker and fluorochrome used (e.g. CD4-FITC).
- The axis scales are clearly visible. Include numbers along axes only for bottom left plot of group (a 'group' is an analysis of identical markers).
- All plots are contour plots with outliers or pseudocolor plots.
- A numerical value for number of cells or percentage (with statistics) is provided.

### Methodology

|                                                                                                                                                           |                                                                                                                                                                                                                                                                                                                                                                                                                                                                                                                                                                                                                                                                                                                                                                                                                                                                                |
|-----------------------------------------------------------------------------------------------------------------------------------------------------------|--------------------------------------------------------------------------------------------------------------------------------------------------------------------------------------------------------------------------------------------------------------------------------------------------------------------------------------------------------------------------------------------------------------------------------------------------------------------------------------------------------------------------------------------------------------------------------------------------------------------------------------------------------------------------------------------------------------------------------------------------------------------------------------------------------------------------------------------------------------------------------|
| Sample preparation                                                                                                                                        | Single-cell suspensions of human breast epithelial cells were obtained as described in Shipitsin, 2007, Cancer Cell. Samples for BrdU staining have been pulsed with BrdU (10 $\mu$ M) for 1h and subsequently stained with the FITC BrdU Flow Kit (BD Biosciences) according to the manufacturer's instruction.                                                                                                                                                                                                                                                                                                                                                                                                                                                                                                                                                               |
| Instrument                                                                                                                                                | M Fortessa and M Aria II SORP UV were used for data collection.                                                                                                                                                                                                                                                                                                                                                                                                                                                                                                                                                                                                                                                                                                                                                                                                                |
| Software                                                                                                                                                  | BD FACSDiva 8.0.1 was used for data collection and FlowJo v10 was used for data analysis. Cytobank was used for data analysis of BrdU assay.                                                                                                                                                                                                                                                                                                                                                                                                                                                                                                                                                                                                                                                                                                                                   |
| Cell population abundance                                                                                                                                 | We collected at least 100,000 cells in each cell fraction. For BrdU analysis, data from 10,000 single cells has been collected and analyzed.                                                                                                                                                                                                                                                                                                                                                                                                                                                                                                                                                                                                                                                                                                                                   |
| Gating strategy                                                                                                                                           | <p>Gating strategy used for the quantification of CD10+CD44+ and CD10+CD44- cells. Single cell suspension derived from organoids were stained with viability dye-pacific blue, CD24-APC, CD44-PE, and CD10-FITC. Each single-color control was run in parallel to ensure proper compensation. Cells were gated using forward scatter (FSC) and side scatter (SSC) and then gated for the pacific blue negative viable cells. Next, CD24-APC+ cells were gated and sorted for other studies. The remaining CD24-APC negative cells were gated for CD10-FITC+CD44-PE+ and CD10-FITC+CD44-PE- cells and sorted.</p> <p>For cell cycle analysis using BrdU-labelled cells, single cells were gated based on 7-AAD-H/7-AAD-A. Singlets were subsequently gated for S-phase (FITC-BrdU positive, G1-phase (single DNA (7-AAD)-content) and G2/M-phase (double (7-AAD)-content)).</p> |
| <input checked="" type="checkbox"/> Tick this box to confirm that a figure exemplifying the gating strategy is provided in the Supplementary Information. |                                                                                                                                                                                                                                                                                                                                                                                                                                                                                                                                                                                                                                                                                                                                                                                                                                                                                |
